# Supplementary material for: Genome-wide transcription start site mapping of Bradyrhizobium japonicum grown free-living or in symbiosis – a rich resource to identify new transcripts, proteins and to study gene regulation
Source: PubMed Central journal article supplement (PMC4842269; doi:10.1186/s12864-016-2602-9), 2016-04-23
Supplement: 12864_2016_2602_MOESM1_ESM.pdf [file 12864_2016_2602_MOESM1_ESM.pdf]

## Additional File 1: Supplementary Tables S1 and S2.

| Read Statistics                                                            | Condition (TEX treatment) |          |           |           |
|----------------------------------------------------------------------------|---------------------------|----------|-----------|-----------|
|                                                                            | Free (-)                  | Free (+) | Nod (-)   | Nod (+)   |
| Number of raw reads                                                        | 2,562,586                 | 872,577  | 3,637,968 | 1,810,278 |
| Total number of mapped reads                                               | 2,447,113                 | 822,112  | 3,000,241 | 1,685,581 |
| Fraction of reads mapped to <i>B. japonicum</i> USDA 110 genome            | 95,62 %                   | 91,17 %  | 13,68 %   | 22,73 %   |
| Fraction of reads mapped to <i>Glycine max</i> genome                      | 0,35 %                    | 0,09%    | 70,51 %   | 72,27 %   |
| Fraction of non-mapped reads                                               | 3,47 %                    | 3,73%    | 15,70 %   | 4,72 %    |
| Number of reads mapped to <i>B. japonicum</i> USDA 110 genome              | 2,432,900                 | 783,084  | 487,925   | 405,948   |
| Number of reads mapped to <i>B. japonicum</i> rRNA                         | 1,439,054                 | 153,725  | 336,998   | 64,278    |
| Number of reads of <i>B.japonicum</i> after filtering reads mapped to rRNA | 993,846                   | 629,359  | 150,927   | 341,670   |
| Fraction <i>B.japonicum</i> of reads mapped to rRNA                        | 59.002 %                  | 19.163 % | 68.996 %  | 15.036 %  |

**Supplementary Table S1. Read mapping statistics.** Numbers of reads obtained by dRNA-seq and of reads mapped to the genome of *B. japonicum* USDA 110 (NC\_004463) are shown (reads mapping to the *Glycine max* genome were not considered further). Free (-), reads of the RNA sample from exponentially growing, free- living cells, without TEX treatment; Free (+), reads of the RNA sample from exponentially growing, free- living cells, with TEX treatment; Nod (-, reads of the RNA sample from nodules, without TEX treatment; Nod (+), reads of the RNA sample from nodules, with TEX treatment.

| TSS category | No. of genes | No. of expressed genes | No. of operons (genes in these operons) | No. of expressed operons (genes in these operons) |
|--------------|--------------|------------------------|-----------------------------------------|---------------------------------------------------|
|              | 9,245        | 4,214                  | 6,352 (9,245)                           | 3,324 (5,005)                                     |
| iTSS         | 3,543        | 1,664                  | 2,632 (4,921)                           | 1,514 (2,931)                                     |
| aTSS_5       | 1,095        | 295                    | 1,095 (1,602)                           | 388 (681)                                         |
| aTSS_i       | 1,933        | 909                    | 1,772 (3,336)                           | 938 (1,851)                                       |
| aTSS_3       | 782          | 419                    | 782 (1,098)                             | 419 (604)                                         |

**Supplementary Table S2. Numbers of annotated genes and operons associated with different TSSs.** Expressed genes or operons are genes or operons with mapped gene TSSs. No., number.
